# Supplementary material
Source: publisher figshare collection journal article supplement (https://tandf.figshare.com/ndownloader/files/17874890)
Supplement: Supplementary file 1 [file 17874890]

**Supporting Information**

Synthesis, structural, electrochemical and spectroscopic characterization, and theoretical calculations of two new Cu2+ and Ni2+ complexes from 2‑(1‑((pyridine-2-ylmethyl)imino)ethyl)naphtalen-1-ol

KEILY J. GUTIÉRREZ, WILFREDO M. PEDREIRA and DALICE M. PIÑERO CRUZ*

| S1 | UV-Vis spectrum obtained for the Cu(II) complexes and its starting materials | Page 2 |
| --- | --- | --- |
| S2 | UV-Vis spectrum obtained for the Ni(II) complexes and its starting materials | Page 2 |
| S3 | Comparison of the FT-IR’s obtained for the ligand and the Cu(II) and Ni(II) complexes | Page 3 |
| S4 | 1H NMR spectra of the ligand (**L**). Solvent: CD3Cl | Page 3 |
| S5 | 13C NMR spectra of the ligand (**L**). Solvent: CD3Cl | Page 4 |
| S6 | Selected bond length of complexes CuL2, **2**, **3** and NiL+ | Page 4 |
| S7 | Expanded lattice obtained for ligand **L** | Page 5 |
| S8 | Expanded lattice obtained for the Cu(II) complex. Lateral view | Page 5 |
| S9 | Expanded lattice obtained for the Cu(II) complex | Page 6 |
| S10 | Lattice expansion obtained for the Ni(II) complex. Point of view: A axis | Page 6 |
| S11 | Lattice expansion obtained for the Ni(II) complex. Point of view: B axis | Page 7 |
| S12 | Optimized structure for (a) **2**, (b) Cu**L**2, (c) Ni**L**(MeOH)+ and (d) **3** | Page 8 |
| S13 | Cartesian coordinates for **2** | Page 8 |
| S14 | Cartesian coordinates for **L** | Page 10 |
| S15 | Cartesian coordinates for Cu**L**2 | Page 11 |
| S16 | Cartesian coordinates for **3** | Page 13 |
| S17 | Cartesian coordinates for Ni**L**(MeOH)+ | Page 16 |
| S18 | Compound H2CarlCl | Page 18 |

**S1.** UV-Vis spectrum obtained for the Cu(II) complexes and its starting materials. Solvent: MeOH.

**S2.** UV-Vis spectrum obtained for the Ni(II) complexes and its starting materials. Solvent: MeOH.

**S3.** Comparison of the FT-IR’s obtained for the ligand **LH** (here **L4**) and the Cu(II) and Ni(II) complexes.

**S4.** 1H NMR spectra of the ligand (**L**). Solvent: CD3Cl.

**S5.** 13C NMR spectra of the ligand (**L**). Solvent: CDCl3.

**S6.** Selected bond length of complexes CuL2, **2**, **3** and NiL+.

| Bond M-N(Py)/System | Experimental/Å | DFT/Å |
| --- | --- | --- |
| Cu-N (CuL+, **2**) | 1.9704 | 2.0161 |
| Cu-N (CuL2) |  | 2.3874 |
| Ni-N (NiL+) |  | 1.9130 |
| Ni-N (NiL2, **3**) | 2.0816 | 2.1686 |


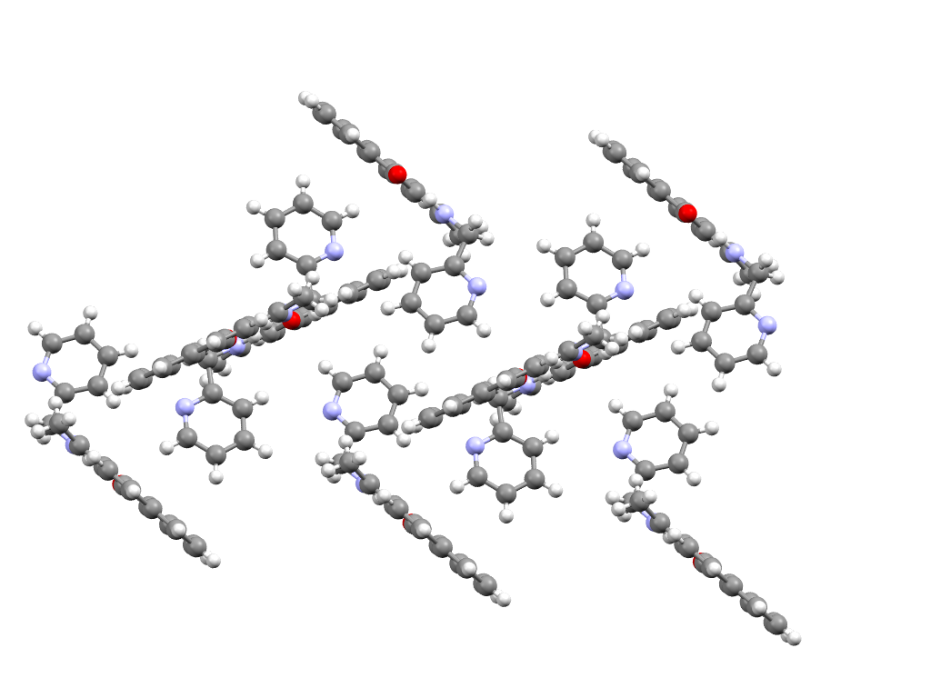


**S7.** Expanded lattice obtained for ligand **L**.

**
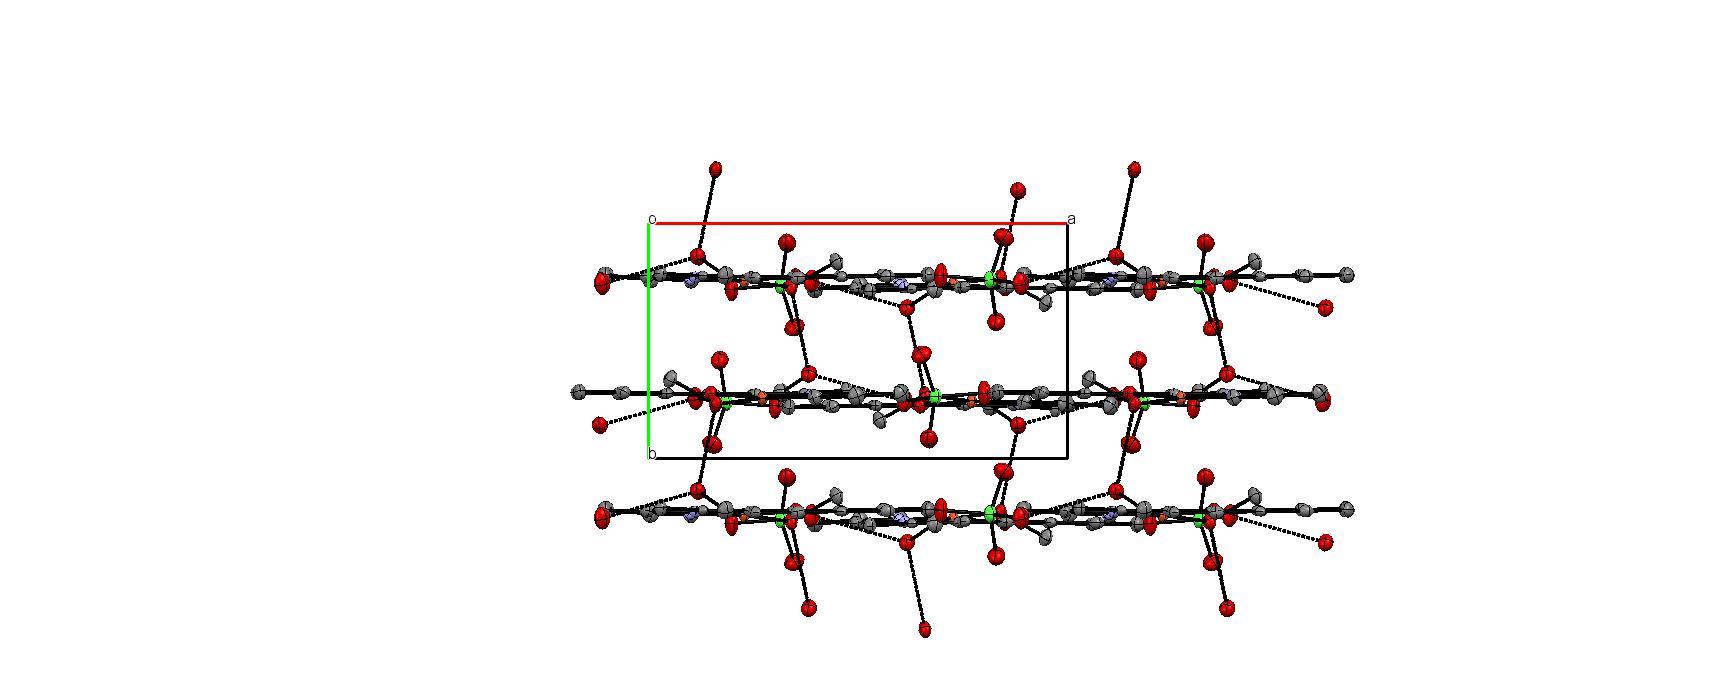
**

**S8.** Expanded lattice obtained for the Cu(II) complex.


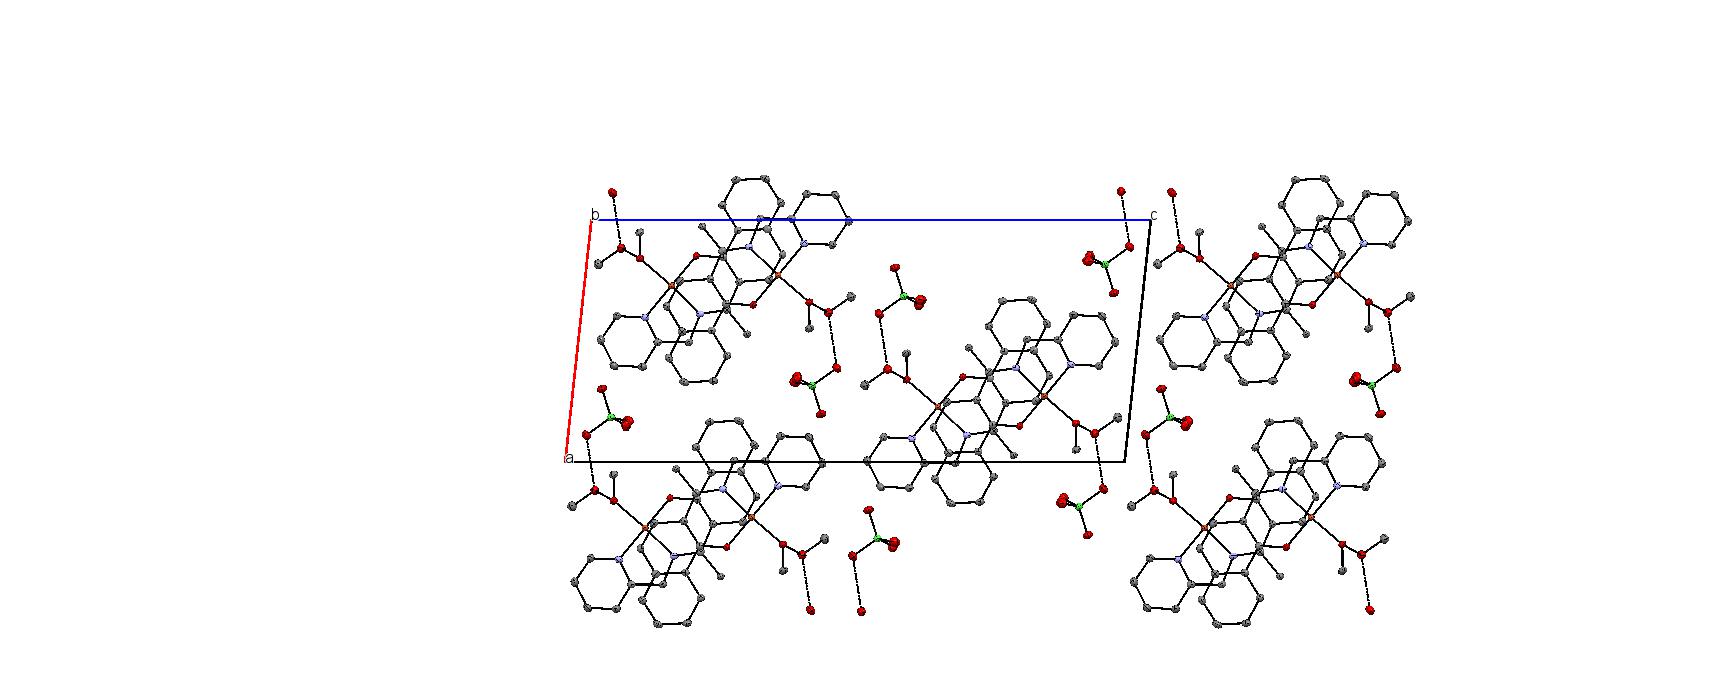


**S9.** Expanded lattice obtained for the Cu(II) complex.


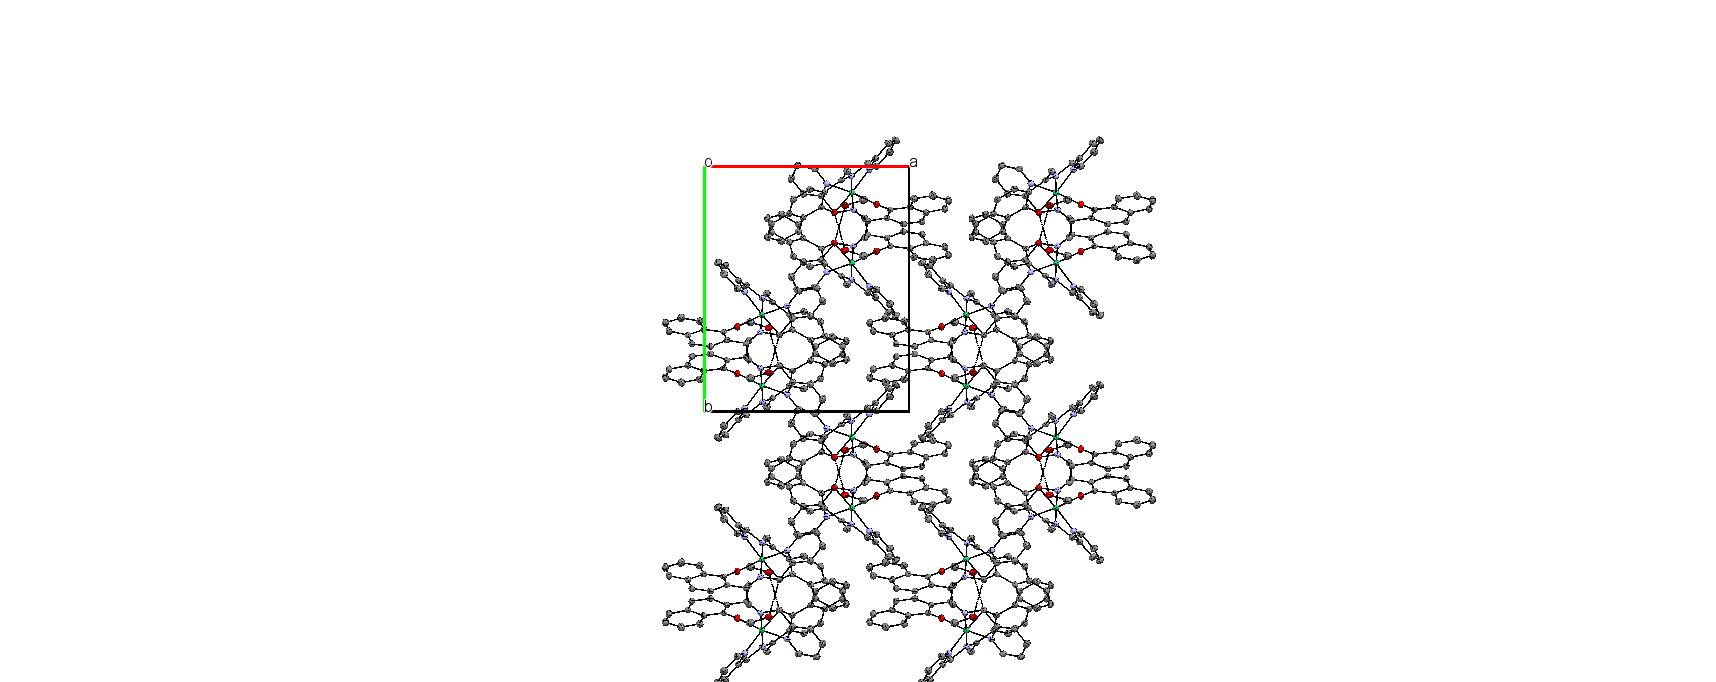


**S10.** Lattice expansion obtained for the Ni(II) complex.


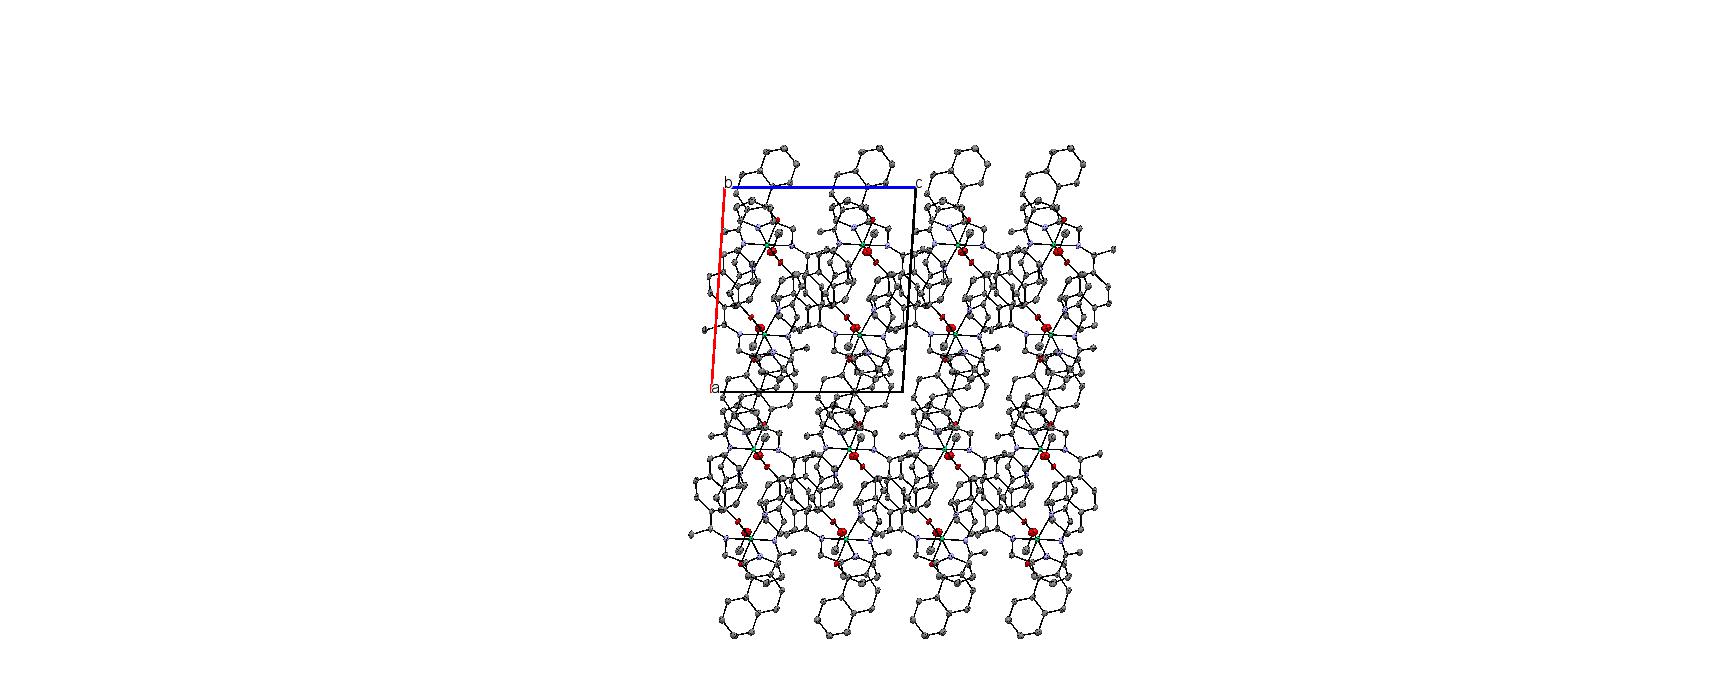


**S11.** Lattice expansion obtained for the Ni(II) complex.


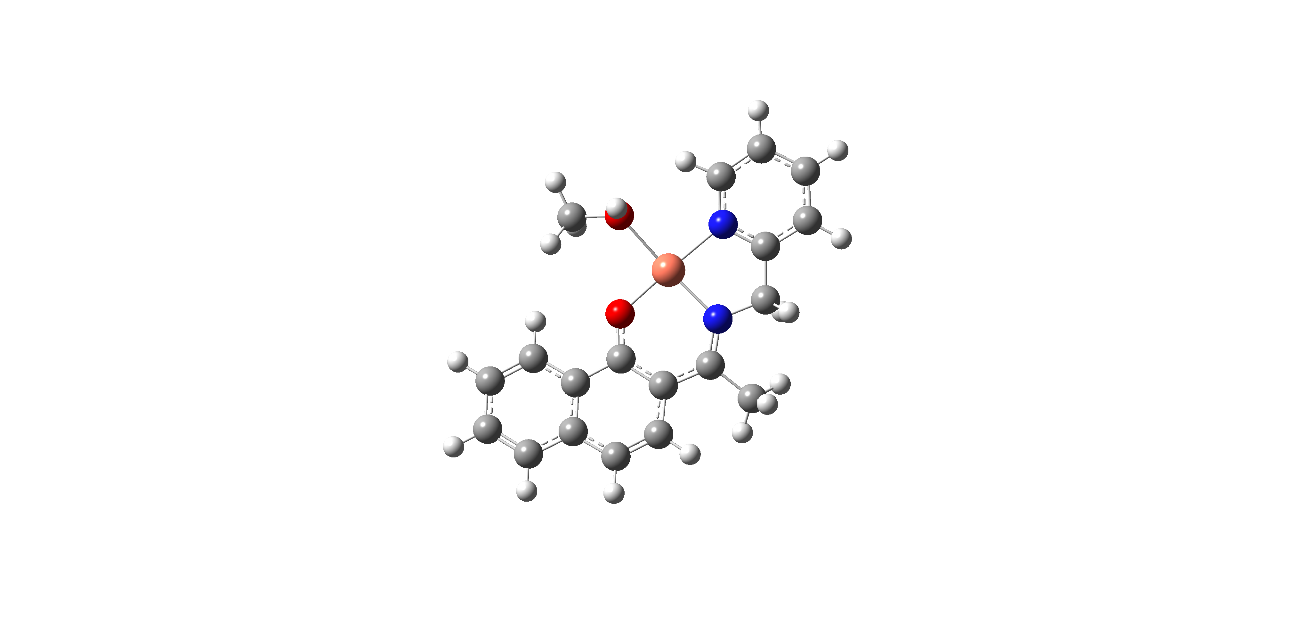

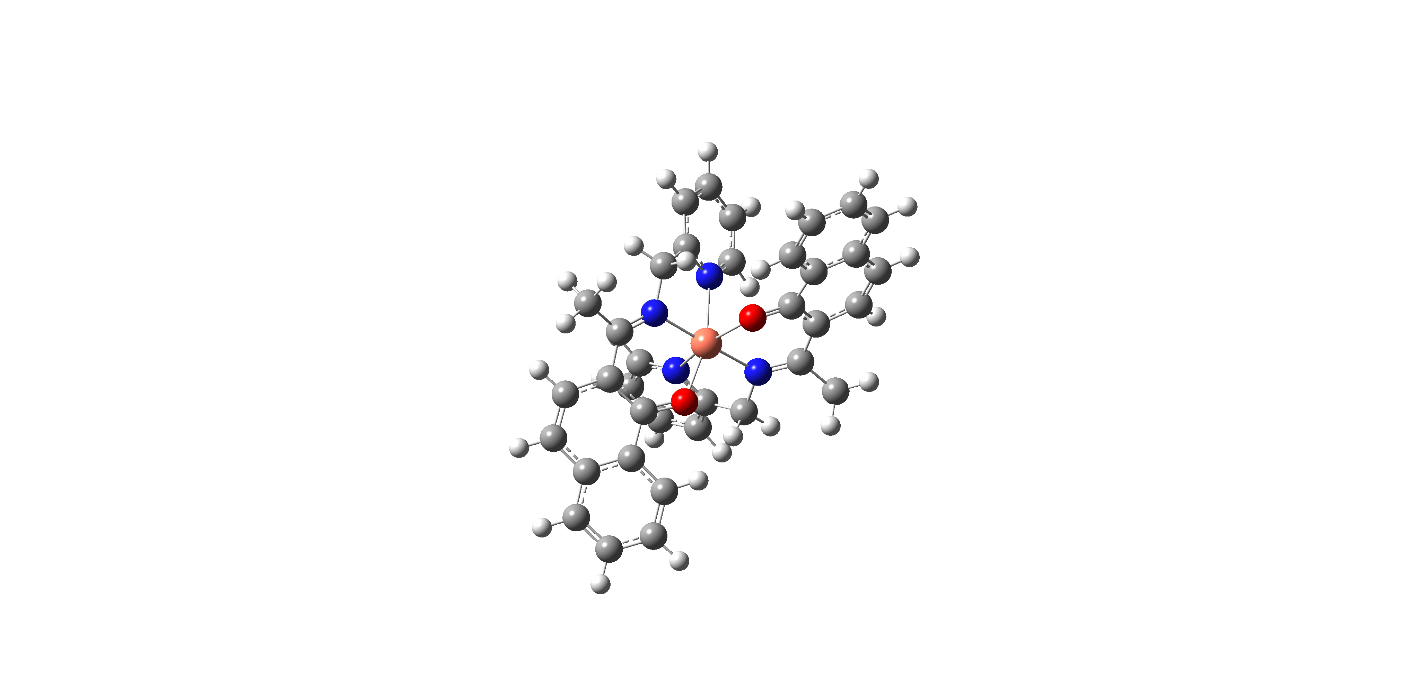

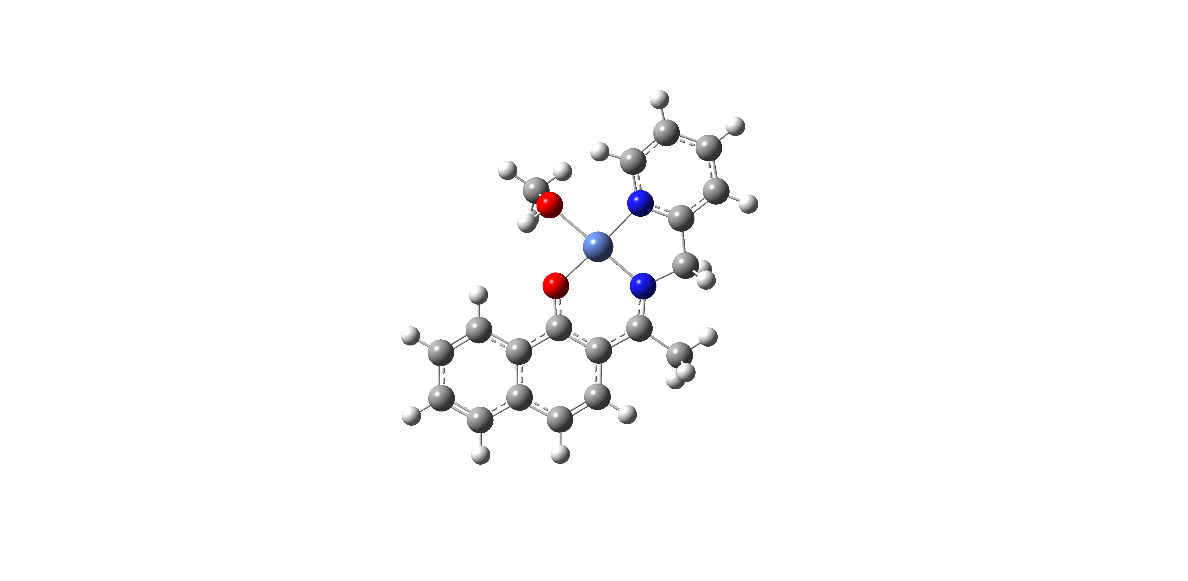

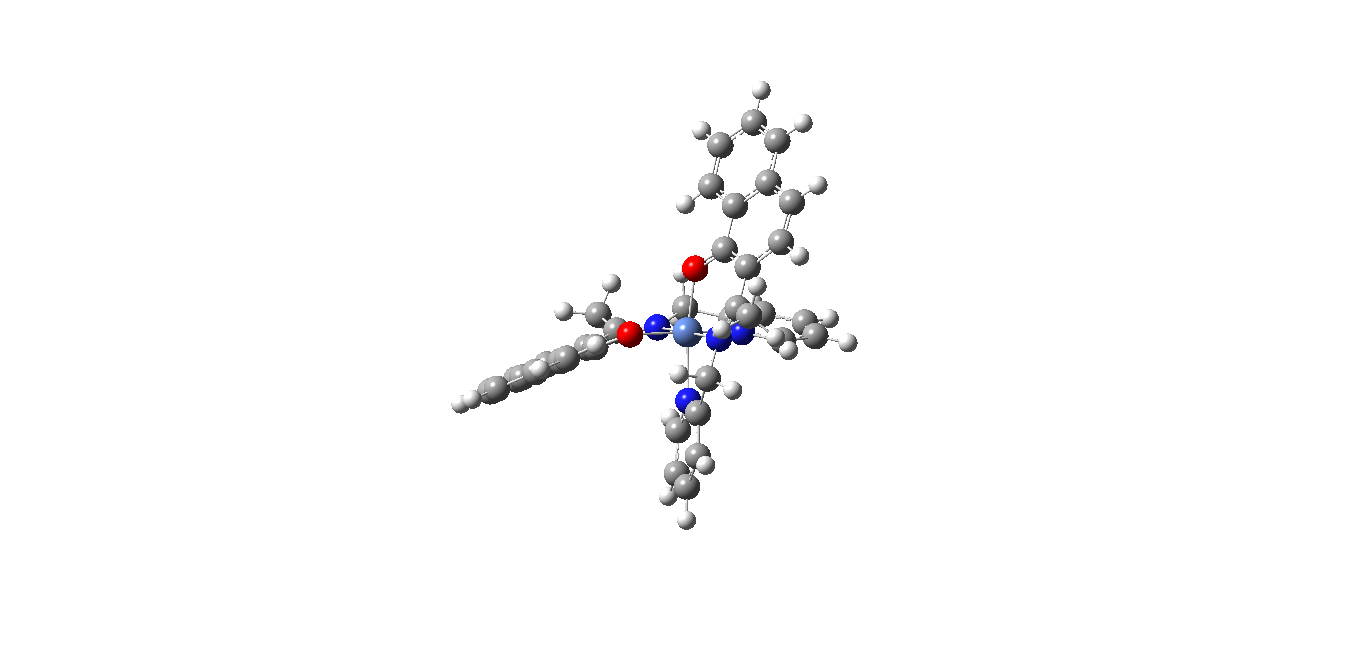


(b)

(d)

(c)

(a)

**S12**. Optimized structure for (a) **2**, (b) Cu**L**2, (c) Ni**L**(MeOH)+ and (d) **3**.

**S13.** Cartesian coordinates for **2**.

Cu -1.0254100000 -0.6037620000 -0.0049760000

O 0.8024820000 -0.7367930000 -0.3445550000

O -1.1440720000 -2.6492190000 0.5061390000

H -1.2054420000 -2.7817000000 1.4627220000

N -3.0317180000 -0.4055960000 -0.0175640000

N -1.0140710000 1.3644070000 -0.0082950000

C 0.0677880000 2.1164050000 -0.0716600000

C -2.3484390000 1.9391480000 -0.1543550000

H -2.4681250000 2.4318830000 -1.1307310000

H -2.5297380000 2.7092640000 0.6069920000

C 1.7012010000 0.1868780000 -0.1348290000

C 3.7922670000 2.0500690000 0.3859520000

H 4.5831200000 2.7550130000 0.6221600000

C -3.4255930000 0.8817580000 -0.0451840000

C 1.4059020000 1.5764980000 0.0297630000

C 3.0841960000 -0.2542630000 -0.0990830000

C -0.0951280000 3.6164770000 -0.2425630000

H -0.9597430000 3.8554900000 -0.8629430000

H 0.7773600000 4.0640740000 -0.7133210000

H -0.2448840000 4.0998740000 0.7309440000

C 3.4154050000 -1.6096480000 -0.3332890000

H 2.6192270000 -2.3073130000 -0.5617510000

C 5.4643310000 0.2206460000 0.2041830000

H 6.2571420000 0.9348510000 0.4070830000

C 4.7301170000 -2.0315150000 -0.2938290000

H 4.9730610000 -3.0734480000 -0.4777990000

C 5.7617690000 -1.1097050000 -0.0190930000

H 6.7930890000 -1.4476770000 0.0114060000

C 4.1267890000 0.6794070000 0.1652030000

C -5.3130060000 -1.1240570000 0.0628990000

H -6.0252230000 -1.9404340000 0.1002860000

C -3.9523680000 -1.3905390000 0.0329580000

H -3.5596600000 -2.4008890000 0.0486550000

C -0.1924080000 -3.6067730000 -0.0301690000

H -0.1254950000 -3.4125530000 -1.0993550000

H -0.5658300000 -4.6192620000 0.1410890000

H 0.7894000000 -3.4711150000 0.4262370000

C 2.4989450000 2.4709420000 0.3057100000

H 2.2882330000 3.5143770000 0.5031070000

C -4.7795480000 1.2216150000 -0.0105850000

H -5.0752630000 2.2656820000 -0.0290080000

C -5.7324930000 0.2091680000 0.0439850000

H -6.7894730000 0.4543410000 0.0707780000

**S14**. Cartesian coordinates for **L**.

O 0.9109920000 -1.2559020000 -1.0911530000

N -1.1702770000 0.1949930000 -1.1033580000

N -4.8258600000 0.1607750000 -0.6456690000

C 1.5240350000 -0.3141060000 -0.5043290000

C 2.9440380000 -0.4771610000 -0.1541560000

C 3.6582350000 0.5684490000 0.4902930000

C 5.6521880000 -0.8301750000 0.4904080000

C 3.6014510000 -1.6835790000 -0.4671280000

C 1.6646420000 1.9678810000 0.4966730000

C 0.8780730000 0.9462980000 -0.1490830000

C 4.9395470000 -1.8630230000 -0.1496280000

C 5.0220050000 0.3641560000 0.8039630000

C -0.4936890000 1.1501990000 -0.4548390000

C 2.9807140000 1.7988660000 0.8025870000

C -3.5558740000 -0.2105020000 -0.4214830000

C -2.5676360000 0.2290840000 -1.4971570000

C -3.1743760000 -0.9727430000 0.6885710000

C -1.2311420000 2.4181060000 -0.1006420000

C -4.1573340000 -1.3649470000 1.5983390000

C -5.4802850000 -0.9860170000 1.3699920000

C -5.7597980000 -0.2243230000 0.2330300000

H 1.2009180000 2.9167630000 0.7419950000

H 3.5377290000 2.5957850000 1.2867460000

H -3.8923110000 -1.9580360000 2.4688780000

H 6.7007700000 -0.9695000000 0.7390630000

H 3.0298090000 -2.4616040000 -0.9616800000

H -6.7770820000 0.0956060000 0.0175610000

H -6.2764130000 -1.2681890000 2.0514560000

H -2.1356420000 -1.2510460000 0.8314710000

H 5.4383290000 -2.7963510000 -0.3939100000

H 5.5735270000 1.1608940000 1.2968320000

H -0.7697390000 2.9344440000 0.7386720000

H -2.2687970000 2.2094780000 0.1678070000

H -1.2393940000 3.1059130000 -0.9555370000

H -2.6736270000 -0.4423990000 -2.3568000000

H -2.8606390000 1.2220000000 -1.8480010000

H -0.5711680000 -0.6357070000 -1.3046200000

**S15**. Cartesian coordinates for Cu**L**2.

Cu -0.0344090000 -0.0036920000 0.1144400000

O 1.6244650000 -0.7662350000 -0.9688530000

O -1.6745820000 -0.3630730000 -0.9859410000

N 1.3953300000 0.2168550000 1.8266660000

N -0.3339580000 -1.7191190000 1.1000680000

N 0.3020910000 1.7750770000 -0.7789390000

N -1.4845170000 1.6741000000 1.3391460000

C -1.3900950000 -2.4908930000 1.0492950000

C 1.6447270000 -0.9902920000 2.3492470000

C 2.6492960000 -0.0521150000 -1.2223580000

C -2.6743130000 -1.0752940000 -0.6121350000

C 1.4022030000 2.1570740000 -1.3836870000

C -3.8500520000 -2.7545970000 0.7569940000

H -3.8351330000 -3.4689450000 1.5733790000

C 5.1439160000 -0.0090770000 -1.6086320000

C -3.9488670000 -0.8608820000 -1.3072920000

C 0.9061180000 -2.1617560000 1.7311990000

H 1.5611780000 -2.5971380000 0.9618830000

H 0.7492390000 -2.9190450000 2.5048810000

C -5.1277100000 -1.5524330000 -0.9101470000

C -1.6334270000 2.6804850000 0.4681090000

C 2.6336200000 1.3808630000 -1.3752910000

C -5.0504890000 -2.4925040000 0.1625240000

H -5.9527330000 -3.0000630000 0.4912410000

C -2.6277440000 -2.0917680000 0.3989870000

C -0.9304500000 2.5529480000 -0.8733150000

H -1.6141670000 2.0192920000 -1.5481990000

H -0.7817040000 3.5568530000 -1.2763170000

C 3.9388400000 -0.7381070000 -1.4082740000

C 3.9845140000 -2.1479040000 -1.3706650000

H 3.0476300000 -2.6787790000 -1.2403560000

C 2.0456510000 1.2884500000 2.2943500000

H 1.7963420000 2.2342130000 1.8225270000

C 6.3583620000 -0.7253330000 -1.7449270000

H 7.2802700000 -0.1676920000 -1.8927470000

C 3.8837580000 2.0580850000 -1.5781430000

H 3.8868950000 3.1430500000 -1.6161760000

C 5.0870170000 1.4179380000 -1.6643130000

H 6.0067020000 1.9832520000 -1.7849910000

C -2.1327720000 1.7296430000 2.5084270000

H -1.9765400000 0.8873520000 3.1787640000

C 2.5679720000 -1.1621750000 3.3850600000

H 2.7473570000 -2.1506950000 3.7969920000

C -4.0161180000 0.0497450000 -2.3847200000

H -3.1002850000 0.5416330000 -2.6923380000

C -2.9651930000 2.7869760000 2.8697830000

H -3.4735910000 2.7840990000 3.8283810000

C 2.9859480000 1.2049530000 3.3175840000

H 3.4967660000 2.0960300000 3.6664640000

C 5.1810550000 -2.8274720000 -1.5165850000

H 5.1998740000 -3.9136670000 -1.4943140000

C 6.3786970000 -2.1066890000 -1.6993570000

H 7.3197870000 -2.6392870000 -1.8101700000

C 1.4058690000 3.4622370000 -2.1792040000

H 0.5809960000 3.4602180000 -2.8977990000

H 2.3227730000 3.5829890000 -2.7495060000

H 1.2800830000 4.3409430000 -1.5355100000

C -1.3248900000 -3.8842580000 1.6671280000

H -0.4028460000 -4.3860000000 1.3617820000

H -2.1533080000 -4.5085970000 1.3421490000

H -1.3327240000 -3.8454320000 2.7633350000

C 3.2487870000 -0.0487200000 3.8716900000

H 3.9727050000 -0.1569180000 4.6741000000

C -2.4420960000 3.7880530000 0.7505380000

H -2.5369440000 4.5919210000 0.0263440000

C -6.3387240000 -1.2853060000 -1.5947740000

H -7.2394370000 -1.8104590000 -1.2861290000

C -5.2079200000 0.2867750000 -3.0449450000

H -5.2419280000 0.9846200000 -3.8769210000

C -3.1194400000 3.8388690000 1.9662360000

H -3.7541600000 4.6870360000 2.2065280000

C -6.3808230000 -0.3829020000 -2.6400560000

H -7.3182770000 -0.1933350000 -3.1562670000

**S16**. Cartesian coordinates for **3**.

Ni 0.0001720000 0.4309800000 0.0009080000

O -1.4902960000 -0.9092290000 -0.2364820000

O 1.4897770000 -0.9113220000 0.2310420000

N -1.4272840000 1.9295840000 -0.6466020000

N 0.3869550000 0.4688010000 -2.0295490000

N -0.3863380000 0.4578030000 2.0316670000

N 1.4275830000 1.9262600000 0.6564220000

C 1.3776930000 -0.1247360000 -2.6449430000

C -1.6045560000 1.9104380000 -1.9752170000

C -2.4924670000 -1.0521520000 0.5474850000

C 2.4923750000 -1.0496710000 -0.5532090000

C -1.3767520000 -0.1393740000 2.6440270000

C 3.7624760000 -0.8282510000 -2.6581150000

H 3.8152320000 -0.4710900000 -3.6818880000

C -4.8763910000 -1.8515390000 0.7591610000

C 3.6871300000 -1.7042320000 -0.0001780000

C -0.7758430000 0.9242650000 -2.7768100000

H -1.4286920000 0.0694580000 -3.0168920000

H -0.5129680000 1.3978330000 -3.7316520000

C 4.8764610000 -1.8476740000 -0.7682320000

C 1.6048290000 1.9000070000 1.9849390000

C -2.5339950000 -0.6638770000 1.9320620000

C 4.8916140000 -1.3708230000 -2.1145900000

H 5.8035690000 -1.4527190000 -2.6990240000

C 2.5345480000 -0.6534880000 -1.9355200000

C 0.7770450000 0.9085460000 2.7809210000

H 1.4301970000 0.0522250000 3.0146670000

H 0.5150000000 1.3758330000 3.7390620000

C -3.6874440000 -1.7036650000 -0.0086540000

C -3.6632110000 -2.1794840000 -1.3377760000

H -2.7384170000 -2.0725290000 -1.8938780000

C -2.1710860000 2.7474420000 0.1106790000

H -1.9807290000 2.6986870000 1.1786470000

C -6.0055910000 -2.4593460000 0.1567230000

H -6.9149350000 -2.5679500000 0.7432330000

C -3.7615970000 -0.8426740000 2.6542100000

H -3.8138870000 -0.4912270000 3.6799900000

C -4.8909700000 -1.3822240000 2.1081640000

H -5.8026650000 -1.4673860000 2.6925350000

C 2.1704370000 2.7491610000 -0.0962960000

H 1.9800730000 2.7062000000 -1.1645140000

C -2.5450010000 2.7407890000 -2.5941200000

H -2.6656190000 2.7120980000 -3.6729270000

C 3.6622680000 -2.1875610000 1.3262220000

H 2.7371450000 -2.0839530000 1.8824070000

C 3.1299380000 3.5978670000 0.4456480000

H 3.7138660000 4.2464710000 -0.1984400000

C -3.1315260000 3.5980770000 -0.4265500000

H -3.7162220000 4.2424030000 0.2211250000

C -4.7752750000 -2.7776100000 -1.9023340000

H -4.7389280000 -3.1458150000 -2.9240050000

C -5.9584860000 -2.9133880000 -1.1474420000

H -6.8338310000 -3.3804370000 -1.5915210000

C -1.3170110000 -0.3234520000 4.1563530000

H -0.3324220000 -0.7035690000 4.4447670000

H -2.0571250000 -1.0366570000 4.5113020000

H -1.4671690000 0.6239770000 4.6896830000

C 1.3187330000 -0.2997370000 -4.1583730000

H 0.3340830000 -0.6774760000 -4.4496900000

H 2.0586170000 -1.0112670000 -4.5171390000

H 1.4698290000 0.6507820000 -4.6859060000

C -3.3182750000 3.5921620000 -1.8101800000

H -4.0560640000 4.2425280000 -2.2708730000

C 2.5443630000 2.7279360000 2.6084340000

H 2.6649760000 2.6934610000 3.6870700000

C 6.0054440000 -2.4586940000 -0.1686470000

H 6.9150940000 -2.5638900000 -0.7553050000

C 4.7741360000 -2.7886830000 1.8879810000

H 4.7373240000 -3.1626360000 2.9075450000

C 3.3167170000 3.5844710000 1.8292100000

H 4.0537770000 4.2331100000 2.2934910000

C 5.9577510000 -2.9200300000 1.1329380000

H 6.8329500000 -3.3894130000 1.5748390000

**S17**. Cartesian coordinates for Ni**L**(MeOH)+.

Ni 1.0228420000 -0.5315880000 -0.0085710000

O -0.7612210000 -0.7699040000 0.0494200000

O 1.0561390000 -2.5151350000 -0.0779630000

H 0.2026210000 -2.6810000000 -0.5128850000

N 2.9237750000 -0.3730930000 -0.1535580000

N 0.9744830000 1.3196480000 0.1306530000

C -0.1152680000 2.0686660000 0.1906000000

C 2.3102820000 1.9266580000 0.2356920000

H 2.4669860000 2.3579630000 1.2342890000

H 2.4325400000 2.7398740000 -0.4894100000

C -1.7020630000 0.1409850000 0.0085480000

C -3.8555680000 1.9857790000 -0.1075030000

H -4.6781510000 2.6912690000 -0.1682080000

C 3.3689000000 0.8921170000 -0.0175770000

C -1.4477380000 1.5363660000 0.0652070000

C -3.0625640000 -0.3448200000 -0.0801320000

C 0.0254290000 3.5663470000 0.3917980000

H 1.0123240000 3.8644760000 0.7362640000

H -0.6969930000 3.9156020000 1.1306470000

H -0.1781910000 4.0955710000 -0.5459690000

C -3.3446610000 -1.7317330000 -0.1109030000

H -2.5229500000 -2.4362270000 -0.0602270000

C -5.4632190000 0.0938040000 -0.2299130000

H -6.2833600000 0.8044140000 -0.2756410000

C -4.6455390000 -2.1849630000 -0.1983740000

H -4.8503810000 -3.2507070000 -0.2204370000

C -5.7128540000 -1.2642730000 -0.2591780000

H -6.7338310000 -1.6268940000 -0.3286650000

C -4.1401790000 0.5852850000 -0.1389650000

C 5.1600640000 -1.1337840000 -0.5223310000

H 5.8333380000 -1.9571670000 -0.7313570000

C 3.7979320000 -1.3695880000 -0.4119800000

H 3.3700490000 -2.3563210000 -0.5385310000

C 1.0249700000 -3.1852760000 1.2154130000

H 1.9667170000 -2.9535710000 1.7121200000

H 0.9496600000 -4.2628480000 1.0544160000

H 0.1839100000 -2.8222710000 1.8103970000

C -2.5749220000 2.4330770000 -0.0041250000

H -2.4045970000 3.5015370000 0.0046110000

C 4.7259290000 1.1974090000 -0.1154610000

H 5.0586330000 2.2238010000 -0.0015310000

C 5.6329830000 0.1719540000 -0.3663430000

H 6.6934630000 0.3873410000 -0.4480430000

**S18**. Compound H2CarlCl.

Ref. 23 in manuscript. C.-G. Freiherr von Richthofen, A. Stammler, H. Bögge, T. Glaser. *J. Org. Chem.*, **77**, 1435 (2012).
